# Supplementary material for: Synthesis, crystal structure and optical properties of Me(OH)(HCOO)2 (Me = Al, Ga)
Source: Royal Society of Chemistry journal article supplement (doi:10.1039/c8ce00309b), 2018-01-01
Supplement: c8ce00309b4.pdf [file c8ce00309b4.pdf]

Supporting information for

Synthesis, crystal structure and optical properties of  $\text{Me}(\text{OH})(\text{HCOO})_2$  ( $\text{Me} = \text{Al}, \text{Ga}$ )

Vladimir N. Krasil'nikov, Alexander P. Tyutyunnik, Inna V. Baklanova\*, Andrey N. Enyashin, Ivan F. Berger, Vladimir G. Zubkov

Institute of Solid State Chemistry, Ural Branch of the Russian Academy of Sciences 91, Pervomayskaya st.,  
620990 Ekaterinburg, Russia

\*E-mail: baklanova\_i@ihim.uran.ru

Table 1. Structural data for Me(OH)(HCOO)<sub>2</sub> (Me = Al, Ga)

|                                                         | Al(OH)(HCOO) <sub>2</sub> <sup>a</sup> | Ga(OH)(HCOO) <sub>2</sub> <sup>b</sup> |
|---------------------------------------------------------|----------------------------------------|----------------------------------------|
| Space group, #                                          | <i>C</i> 2, 5                          | <i>C</i> 2, 5                          |
| The number of formula units, <i>Z</i>                   | 8                                      | 8                                      |
| Cell constants:                                         |                                        |                                        |
| <i>a</i> , Å                                            | 8.8629(2)                              | 8.8746(1)                              |
| <i>b</i> , Å                                            | 9.9890(2)                              | 10.3291(1)                             |
| <i>c</i> , Å                                            | 10.2411(1)                             | 10.27870(9)                            |
| $\beta$ , °                                             | 106.223(1)                             | 105.7565(6)                            |
| <i>V</i> , Å <sup>3</sup>                               | 870.56(3)                              | 906.81(2)                              |
| <i>D</i> <sub>x</sub> , g/cm <sup>3</sup>               | 2.045                                  | 2.589                                  |
| wRp (X-ray/Neutron1/Neutron2), %                        | 2.51/1.92/-                            | 2.81/1.23/0.66                         |
| Rp (X-ray/Neutron1/Neutron2), %                         | 1.86/1.51/-                            | 2.02/0.99/0.53                         |
| R( <i>F</i> <sup>2</sup> ) (X-ray/Neutron1/Neutron2), % | 2.60/8.79/-                            | 2.82/5.28/1.64                         |
| $\chi^2$                                                | 2.644                                  | 2.124                                  |
| $\chi^2$ for space group <i>C</i> 2/ <i>c</i> , 15      | 3.077                                  | 2.505                                  |

a - CCDC 1547303

b - CCDC 1547304

Table 2. Atomic coordinates and isotropic thermal parameters (*U*<sub>iso</sub> × 100, Å<sup>2</sup>) for Al(OH)(HCOO)<sub>2</sub> and Ga(OH)(HCOO)<sub>2</sub> (given in *Italic*)

| Atom  | Wyckoff    | <i>x/a</i>                        | <i>y/b</i>                        | <i>z/c</i>                      | <i>U</i> <sub>iso</sub> *100 |
|-------|------------|-----------------------------------|-----------------------------------|---------------------------------|------------------------------|
| Me(1) | 4 <i>c</i> | -0.0018(11)<br><i>-0.0020(8)</i>  | 0.2194(8)<br><i>0.2477(7)</i>     | 0.2490(8)<br><i>0.2484(6)</i>   | 1.67(6)<br><i>1.60(3)</i>    |
| Me(2) | 4 <i>c</i> | 0.2502(10)<br><i>0.2454(7)</i>    | -0.0331(10)<br><i>-0.0063(7)</i>  | 0.2478(7)<br><i>0.2501(5)</i>   | 2.48(7)<br><i>1.87(4)</i>    |
| O(1)  | 4 <i>c</i> | 0.4193(12)<br><i>0.4275(9)</i>    | 0.0380(8)<br><i>0.0715(8)</i>     | 0.1935(8)<br><i>0.1839(7)</i>   | 1.84(3)<br><i>1.59(3)</i>    |
| O(2)  | 4 <i>c</i> | 0.3623(12)<br><i>0.3760(17)</i>   | -0.1792(11)<br><i>-0.1470(13)</i> | 0.3211(7)<br><i>0.3323(12)</i>  | 1.84(3)<br><i>1.59(3)</i>    |
| O(3)  | 4 <i>c</i> | 0.0647(10)<br><i>0.0611(9)</i>    | -0.1193(8)<br><i>-0.0800(8)</i>   | 0.2952(8)<br><i>0.2888(8)</i>   | 1.84(3)<br><i>1.59(3)</i>    |
| O(4)  | 4 <i>c</i> | 0.1225(12)<br><i>0.1318(17)</i>   | 0.1120(12)<br><i>0.1436(13)</i>   | 0.1696(7)<br><i>0.1737(12)</i>  | 1.84(3)<br><i>1.59(3)</i>    |
| O(5)  | 4 <i>c</i> | 0.1647(10)<br><i>0.1583(10)</i>   | 0.2344(6)<br><i>0.2537(8)</i>     | 0.4227(11)<br><i>0.4287(11)</i> | 1.84(3)<br><i>1.59(3)</i>    |
| O(6)  | 4 <i>c</i> | 0.5933(10)<br><i>0.5839(12)</i>   | -0.1251(6)<br><i>-0.0967(6)</i>   | 0.2064(6)<br><i>0.1747(9)</i>   | 1.84(3)<br><i>1.59(3)</i>    |
| O(7)  | 4 <i>c</i> | 0.3105(10)<br><i>0.3239(10)</i>   | 0.0511(8)<br><i>0.0926(6)</i>     | 0.4259(9)<br><i>0.4197(8)</i>   | 1.84(3)<br><i>1.59(3)</i>    |
| O(8)  | 4 <i>c</i> | -0.0783(11)<br><i>-0.0963(12)</i> | 0.0570(6)<br><i>0.0850(6)</i>     | 0.3198(7)<br><i>0.3014(8)</i>   | 1.84(3)<br><i>1.59(3)</i>    |
| O(9)  | 4 <i>c</i> | -0.1499(10)<br><i>-0.1779(10)</i> | 0.2256(6)<br><i>0.2376(8)</i>     | 0.0754(11)<br><i>0.0753(11)</i> | 1.84(3)<br><i>1.59(3)</i>    |
| O(10) | 4 <i>c</i> | -0.3267(9)<br><i>-0.3114(10)</i>  | 0.3818(8)<br><i>0.4239(6)</i>     | 0.0809(9)<br><i>0.0648(8)</i>   | 1.84(3)<br><i>1.59(3)</i>    |
| C(1)  | 4 <i>c</i> | -0.0460(11)                       | -0.0662(6)                        | 0.3322(8)                       | 1.84(3)                      |

|      |    |                    |                   |                   |                |
|------|----|--------------------|-------------------|-------------------|----------------|
|      |    | <i>-0.0506(11)</i> | <i>-0.0305(6)</i> | <i>0.3257(11)</i> | <i>1.59(3)</i> |
| C(2) | 4c | 0.2826(11)         | 0.1614(8)         | 0.4746(8)         | 1.84(3)        |
|      |    | <i>0.2775(11)</i>  | <i>0.1848(8)</i>  | <i>0.4798(8)</i>  | <i>1.59(3)</i> |
| C(3) | 4c | 0.2693(11)         | 0.2951(8)         | 0.9808(9)         | 1.84(3)        |
|      |    | <i>0.2797(13)</i>  | <i>0.3188(7)</i>  | <i>0.9850(7)</i>  | <i>1.59(3)</i> |
| C(4) | 4c | 0.4419(11)         | -0.0029(6)        | 0.7912(9)         | 1.84(3)        |
|      |    | <i>0.4416(10)</i>  | <i>0.0230(6)</i>  | <i>0.8164(12)</i> | <i>1.59(3)</i> |
| H(1) | 4c | 0.613(3)           | 0.370(1)          | 0.616(4)          | 1.84(3)        |
|      |    | <i>0.616(1)</i>    | <i>0.4068(9)</i>  | <i>0.622(1)</i>   | <i>1.59(3)</i> |
| H(2) | 4c | 0.364(3)           | 0.194(2)          | 0.572(3)          | 1.84(3)        |
|      |    | <i>0.357(2)</i>    | <i>0.217(1)</i>   | <i>0.5769(9)</i>  | <i>1.59(3)</i> |
| H(3) | 4c | 0.334(3)           | 0.270(3)          | 0.087(1)          | 1.84(3)        |
|      |    | <i>0.338(2)</i>    | <i>0.301(1)</i>   | <i>0.0932(8)</i>  | <i>1.59(3)</i> |
| H(4) | 4c | 0.351(1)           | 0.0720(8)         | 0.794(4)          | 1.84(3)        |
|      |    | <i>0.350(1)</i>    | <i>0.0906(9)</i>  | <i>0.829(1)</i>   | <i>1.59(3)</i> |
| H(5) | 4c | 0.158(4)           | 0.282(3)          | 0.606(3)          | 1.84(3)        |
|      |    | <i>0.125(3)</i>    | <i>0.321(1)</i>   | <i>0.586(1)</i>   | <i>1.59(3)</i> |
| H(6) | 4c | 0.396(2)           | 0.620(1)          | 0.9211(9)         | 1.84(3)        |
|      |    | <i>0.379(2)</i>    | <i>0.643(1)</i>   | <i>0.916(1)</i>   | <i>1.59(3)</i> |

Thermal parameters of oxygen, carbon and hydrogen atoms were constrained as a single variable.

Table 3. Selected interatomic distances  $d$  (Å) for Al(OH)(HCOO)<sub>2</sub> and Ga(OH)(HCOO)<sub>2</sub> (given in Italic)

| Interatomic distances |                               | Interatomic distances |                               |
|-----------------------|-------------------------------|-----------------------|-------------------------------|
| Me(1)-O(2)            | 1.876(12)<br><i>1.899(17)</i> | Me(2)-O(1)            | 1.877(11)<br><i>2.078(10)</i> |
| Me(1)-O(4)            | 1.878(12)<br><i>1.911(17)</i> | Me(2)-O(2)            | 1.807(11)<br><i>1.907(15)</i> |
| Me(1)-O(5)            | 1.975(13)<br><i>2.008(12)</i> | Me(2)-O(3)            | 2.032(11)<br><i>1.941(9)</i>  |
| Me(1)-O(6)            | 1.876(11)<br><i>2.013(13)</i> | Me(2)-O(4)            | 1.875(12)<br><i>1.897(16)</i> |
| Me(1)-O(8)            | 1.973(11)<br><i>2.018(12)</i> | Me(2)-O(7)            | 1.943(13)<br><i>1.976(10)</i> |
| Me(1)-O(9)            | 1.893(14)<br><i>2.026(11)</i> | Me(2)-O(10)           | 1.859(13)<br><i>1.970(10)</i> |
| <b>Average</b>        | <b>1.912</b>                  | <b>Average</b>        | <b>1.899</b>                  |
| <b>Average</b>        | <b>1.979</b>                  | <b>Average</b>        | <b>1.962</b>                  |

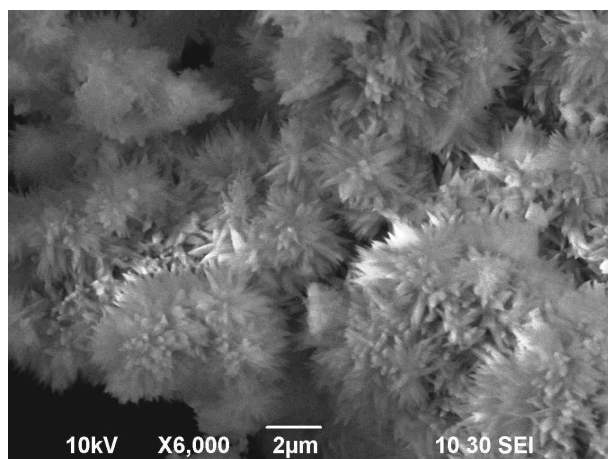

Fig. S1. The SEM image of the crystal aggregates of  $\text{Al}(\text{OH})(\text{HCOO})_2$  produced by heating of aluminum nitrate solution in diluted formic acid at  $80^\circ\text{C}$ .

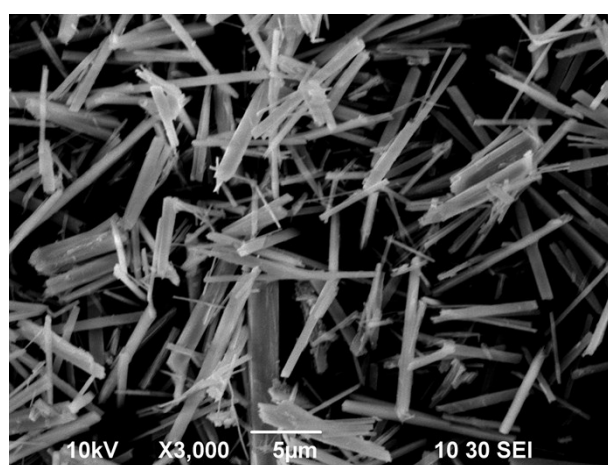

Fig. S2. The SEM image of  $\text{Ga}(\text{OH})(\text{HCOO})_2$  crystals produced by evaporation of gallium nitrate solution in diluted formic acid at  $60^\circ\text{C}$ .

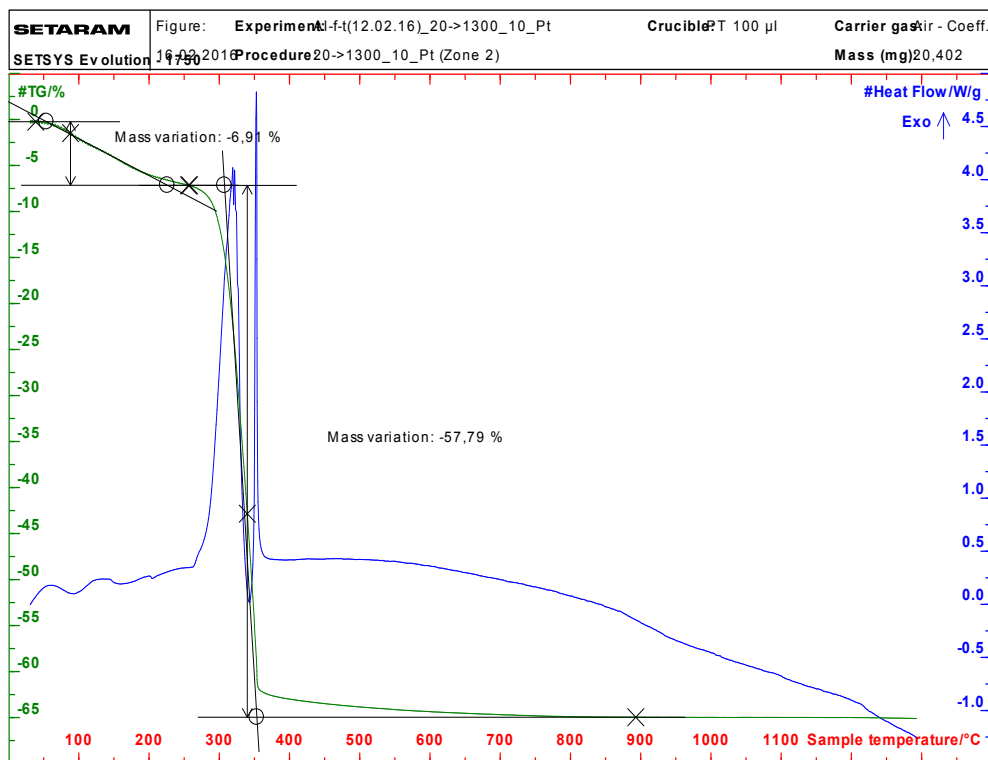

Fig. S3. The thermogravimetric analysis (TG, DTA) of hydrated basic aluminum formate  $\text{Al}(\text{OH})(\text{HCOO})_2 \cdot 0.5\text{H}_2\text{O}$ .

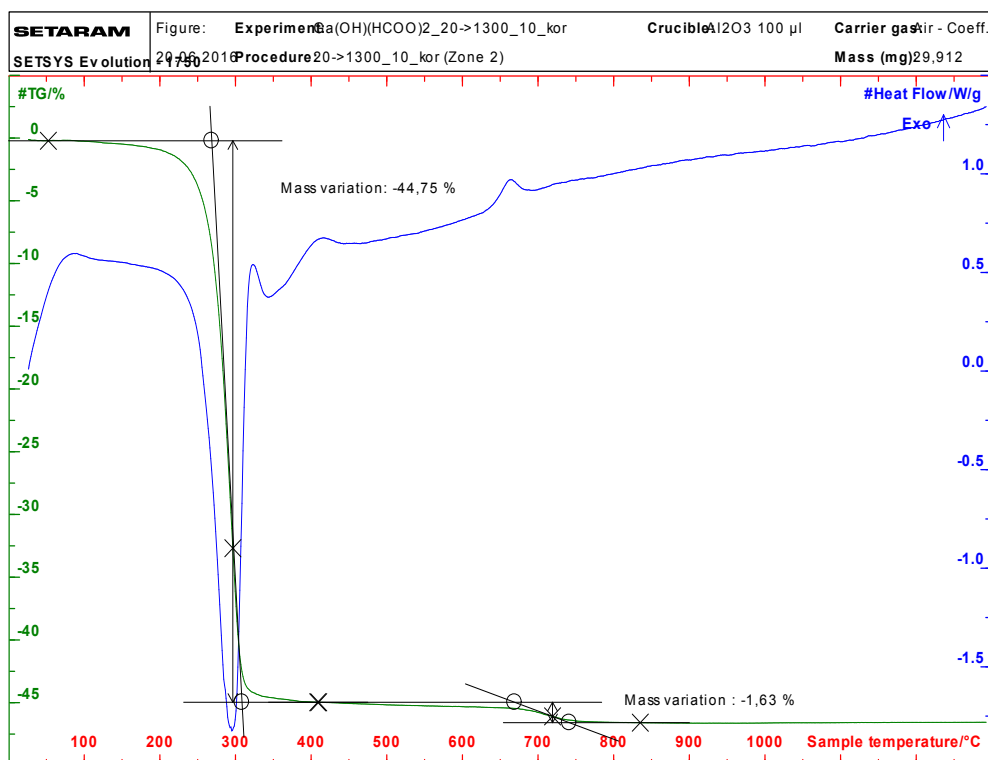

Fig. S4. The thermogravimetric analysis (TG, DTA) of the basic gallium formate  $\text{Ga}(\text{OH})(\text{HCOO})_2$ .

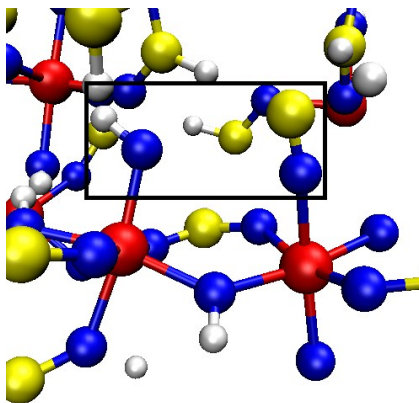

Movie 1 (separate file movie1.mpg or link <https://youtu.be/FmbFAMaYYuk>): Self-consistent charge density-functional tight-binding molecular dynamics simulation (MD using SCC-DFTB method) of the kinetic stability of defect I within the crystal of  $\text{Al}(\text{OH})(\text{HCOO})_2$  at temperature 300 K during 0.2 ns. Only a fragment of crystal is shown with the defect on forefront (framed on the figure). The stable defect I is represented by formate anion decomposed after a possible **intrachain** H migration on OH group and CO molecule.

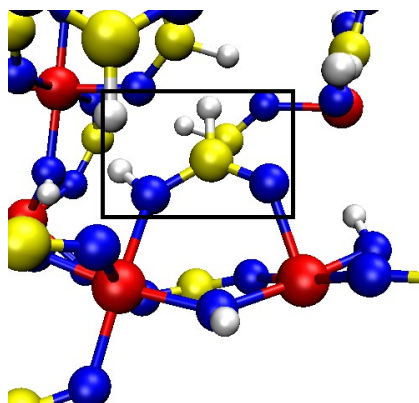

Movie 2 (separate file movie2.mpg or link <https://youtu.be/w3z95fIoaPI>): Self-consistent charge density-functional tight-binding molecular dynamics simulation (MD using SCC-DFTB method) of the kinetic stability of defect II within the crystal of  $\text{Al}(\text{OH})(\text{HCOO})_2$  at temperature 300 K during 0.2 ns. Only a fragment of crystal is shown with the defect on forefront (framed on the figure). The stable defect II is represented by neutral molecule  $\text{HCOOH}$  after a possible **intrachain** H migration from the neighboring OH group. Molecule  $\text{HCOOH}$  acts mostly as a bidentate ligand, yet, a short-living ( $\sim 40$  ps) monodentate conformer can be registered using this MD simulation.

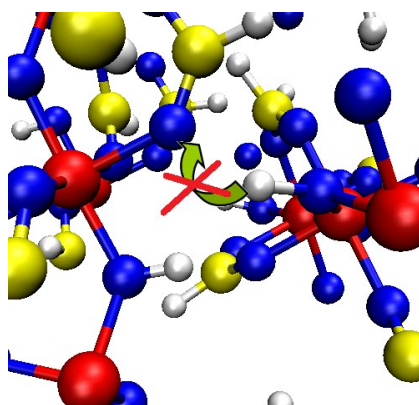

Movie 3 (separate file movie3.mpg or link <https://youtu.be/ikOZo29aRmU>): Self-consistent charge density-functional tight-binding molecular dynamics simulation (MD using SCC-DFTB method) of the kinetic stability of an unstable defect within the crystal of  $\text{Al}(\text{OH})(\text{HCOO})_2$  at temperature 300 K during 0.2 ns. The defect is represented by neutral molecule  $\text{HCOOH}$  after possible **interchain** H migration from the nearest OH group of neighboring molecular-like chain. The first 1 ps of the movie is slowed down to visualize the H migration from the defect, leading to the formation of perfect crystal lattice. A spontaneous **interchain** H migration within perfect crystal is unlikely (crossed arrow on the figure).
